# Supplementary material for: Electrocatalytic generation and tuning of ultra-stable and ultra-dense nanometre bubbles: an in situ molecular dynamics study
Source: Royal Society of Chemistry journal article supplement (doi:10.1039/d1nr01588e), 2021-01-01
Supplement: d1nr01588e1.pdf [file d1nr01588e1.pdf]

## Supplementary Information

### **Electrocatalytic generation and tuning of ultra-stable and ultra-dense nanometre bubbles: An *in situ* molecular dynamics study**

Wenjing Xi<sup>1</sup>, Hao Feng,<sup>1</sup> Dong Liu,\* Longfei Chen, Ying Zhang, Qiang Li\*

MIIT Key Laboratory of Thermal Control of Electronic Equipment, School of Energy and Power Engineering, Nanjing University of Science and Technology, Nanjing 210094, China

<sup>1</sup>These authors contributed equally.

\*Corresponding Authors: [liudong15@njust.edu.cn](mailto:liudong15@njust.edu.cn); [liqiang@njust.edu.cn](mailto:liqiang@njust.edu.cn).

#### Contents

1. Supplementary Figures 1 and 2
2. Supplementary Table 1

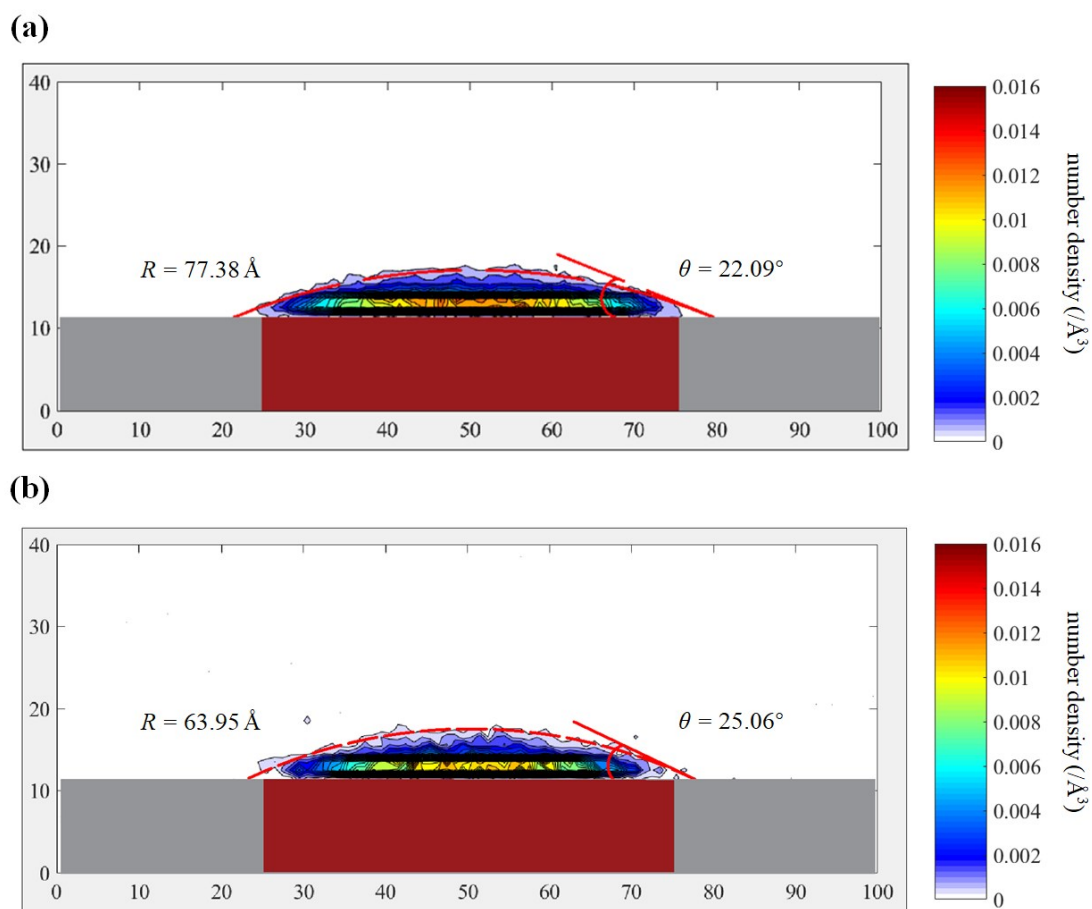

**Figure S1.** Properties of stationary nanobubbles for (a)  $\varepsilon_{WE}=0.35$  and (b)  $\varepsilon_{WE}=0.40$ .

Figures 3 and S1 tell that the contact angles of stationary nanobubbles also increase with increasing  $\varepsilon_{WE}$  and decreasing hydrophobicity.

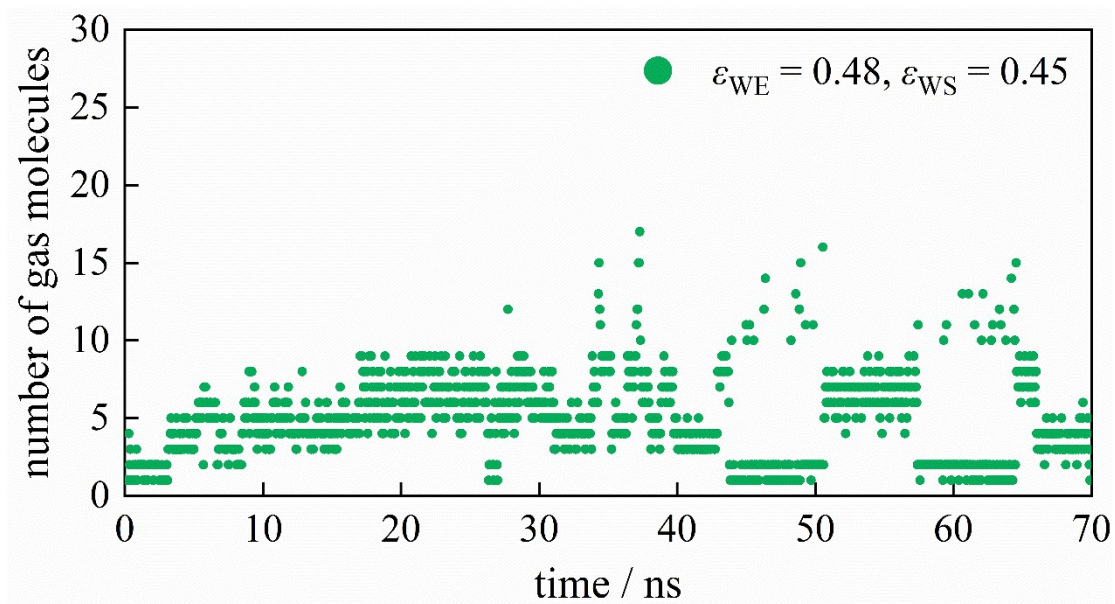

**Figure S2.** Variations of the number of gas molecules inside the largest gas cluster with time for  $\epsilon_{WE}=0.48$  and  $\epsilon_{WS}=0.45$ . Nanobubble neither forms on the nanoelectrode nor on the silica surface with higher hydrophobicity, which means that the formation of nanobubbles is mainly affected by the hydrophobicity of the nanoelectrode.

**Table S1.** The critical time for nanobubble nucleation<sup>a</sup> and the contact angles of critical gas nuclei for various  $\epsilon_{WE}$

| $\epsilon_{WE}$ | critical time for<br>nanobubble nucleation (ns) | contact angle of<br>critical gas nucleus (°) |
|-----------------|-------------------------------------------------|----------------------------------------------|
| 0.35            | 3.5                                             | 13.8                                         |
| 0.40            | 10.5                                            | 16.4                                         |
| 0.45            | 13.3                                            | 18.9                                         |

<sup>a</sup>The nucleation point features abrupt increase of the slope of the  $N-t$  curve and is captured in the insets of Figure 6
